# Supplementary material for: High-Level Drug-Resistant Mutations among HIV-1 Subtype A6 and CRF02_AG in Kazakhstan
Source: MDPI journal article supplement (doi:10.3390/v15071407), 2023-06-21
Supplement: s1 [file s1]

SUPPLEMENTARY MATERIAL

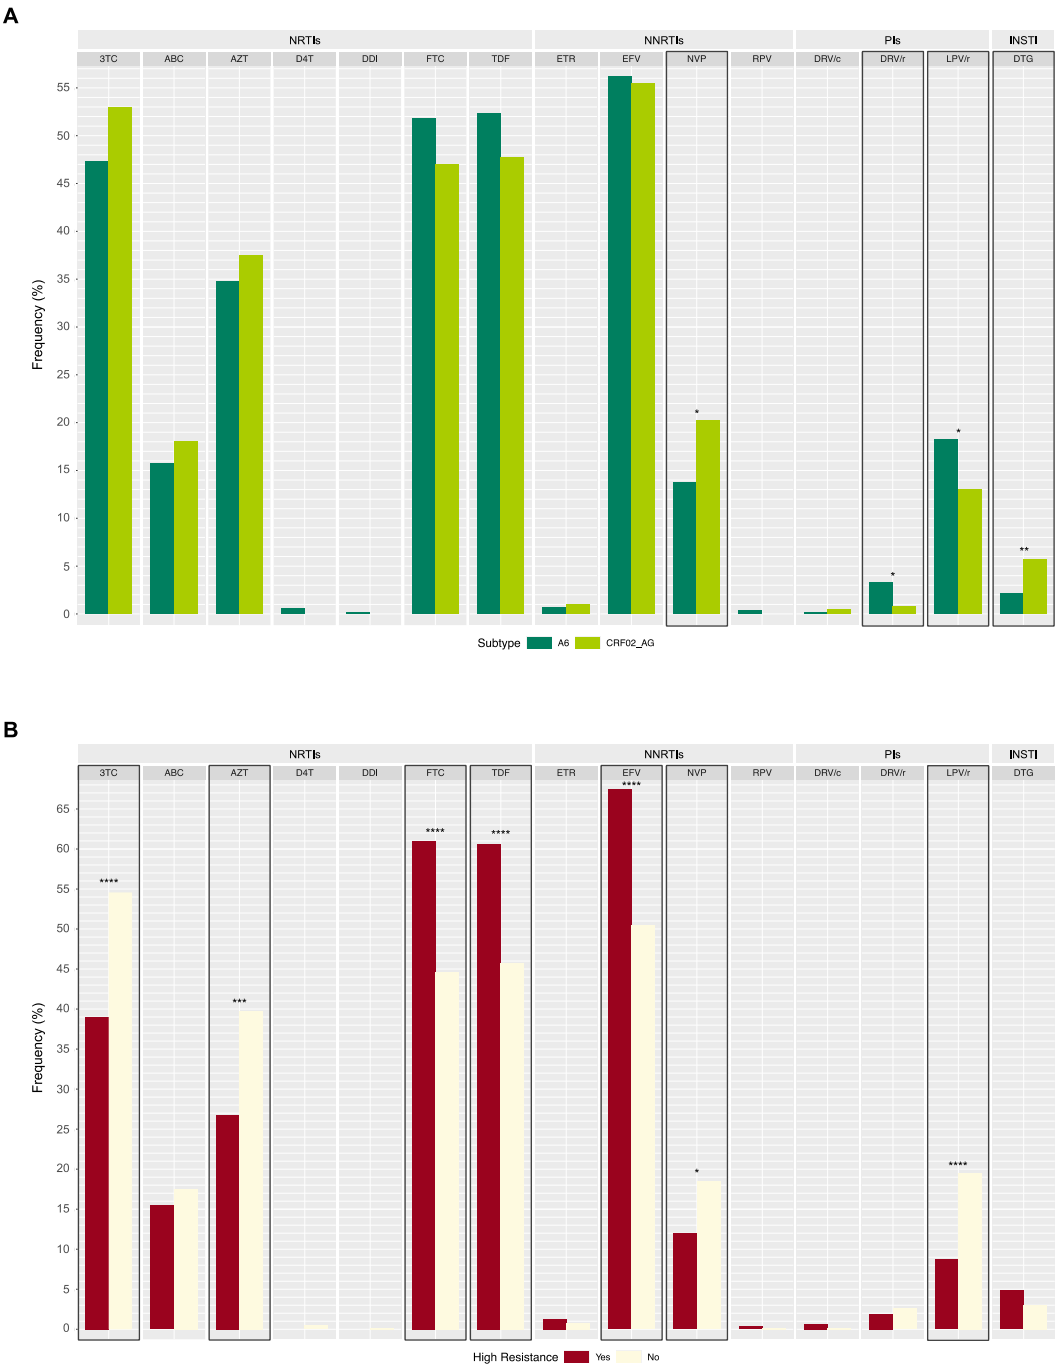

**Figure S1.** Antiretroviral usage among individuals in the Kazakhstan dataset ( $n = 959$ ,  $NA = 9$ ), according to HIV subtype (**A**) and presence/absence of high-level drug resistance (**B**). Highlighted boxes indicate significant differences between categories based on  $\chi^2$  tests for heterogeneity, with asterisks indicating  $p$ -value cut-offs (\* =  $p$ -value < 0.05; \*\* =  $p$ -value < 0.01; \*\*\* =  $p$ -value < 0.001; \*\*\*\* =  $p$ -value < 0.0001). Antiretrovirals are grouped by class: nucleoside reverse transcriptase inhibitors (NRTIs), non-nucleoside reverse transcriptase inhibitors (NNRTIs), protease inhibitors (PIs), and one integrase-strand transfer inhibitor (INSTI). 3TC: lamivudine, ABC: abacavir, AZT: zidovudine, D4T: stavudine, DDI: didanosine, FTC: emtricitabine, TDF: tenofovir, ETR: etravirine, EFV: efavirenz, NVP: nevirapine, RPV: rilpivirine, DRV/c: darunavir/cobicistat, DRV/r: darunavir/ritonavir, LPV/r: lopinavir/ritonavir, DTG: dolutegravir.

**Table S1.** Drug resistant mutations (DRMs) present at over 1% frequency, according to ART generation ( $n = 968$ ).

|                        | <i>1<sup>st</sup> generation</i> | <i>2<sup>nd</sup> generation</i> | <i>1<sup>st</sup> and 2<sup>nd</sup></i> | <i>NA<sup>1</sup></i> | <i>Total</i> |
|------------------------|----------------------------------|----------------------------------|------------------------------------------|-----------------------|--------------|
|                        | <i>n (%)</i>                     | <i>n (%)</i>                     | <i>n (%)</i>                             | <i>n (%)</i>          | <i>n (%)</i> |
| <i>All sequences</i>   | 204 (21.1)                       | 464 (47.9)                       | 291 (30.1)                               | 9 (0.9)               | 968 (100)    |
| <i>NRTI major</i>      |                                  |                                  |                                          |                       |              |
| M184V                  | 23 (11.3)                        | 87 (18.8)                        | 38 (13.1)                                | 1 (11.1)              | 149 (15.4)   |
| K65R                   | 1 (0.5)                          | 36 (7.8)                         | 7 (2.4)                                  | 1 (11.1)              | 45 (4.6)     |
| D67N                   | 2 (1)                            | 10 (2.2)                         | 5 (1.7)                                  | 0                     | 17 (1.8)     |
| K70R                   | 2 (1)                            | 10 (2.2)                         | 4 (1.4)                                  | 0                     | 16 (1.7)     |
| Y115F                  | 2 (1)                            | 9 (1.9)                          | 4 (1.4)                                  | 0                     | 15 (1.5)     |
| M41L                   | 2 (1)                            | 4 (0.9)                          | 8 (2.7)                                  | 0                     | 14 (1.4)     |
| K70E                   | 0                                | 9 (1.9)                          | 4 (1.4)                                  | 0                     | 13 (1.3)     |
| L74I                   | 1 (0.5)                          | 9 (1.9)                          | 3 (1)                                    | 0                     | 13 (1.3)     |
| L74V                   | 2 (1)                            | 3 (0.6)                          | 6 (2.1)                                  | 0                     | 11 (1.1)     |
| <i>NRTI accessory</i>  |                                  |                                  |                                          |                       |              |
| A62V                   | 43 (21.1)                        | 115 (24.8)                       | 70 (24.1)                                | 5 (55.6)              | 233 (24.1)   |
| K219E                  | 3 (1.5)                          | 18 (3.9)                         | 2 (0.7)                                  | 0                     | 23 (2.4)     |
| <i>NNRTI major</i>     |                                  |                                  |                                          |                       |              |
| K103N                  | 28 (13.7)                        | 115 (24.8)                       | 55 (18.9)                                | 1 (11.1)              | 199 (20.6)   |
| G190S                  | 5 (2.5)                          | 48 (10.3)                        | 8 (2.7)                                  | 0                     | 61 (6.3)     |
| Y181C                  | 5 (2.5)                          | 26 (5.6)                         | 11 (3.8)                                 | 0                     | 42 (4.3)     |
| P225H                  | 2 (1)                            | 21 (4.5)                         | 8 (2.7)                                  | 0                     | 31 (3.2)     |
| G190A                  | 3 (1.5)                          | 6 (1.3)                          | 4 (1.4)                                  | 0                     | 13 (1.3)     |
| K238T                  | 3 (1.5)                          | 5 (1.1)                          | 2 (0.7)                                  | 0                     | 10 (1)       |
| <i>NNRTI accessory</i> |                                  |                                  |                                          |                       |              |
| K101E                  | 6 (2.9)                          | 30 (6.5)                         | 8 (2.7)                                  | 0                     | 44 (4.5)     |
| E138A                  | 11 (5.4)                         | 13 (2.8)                         | 16 (5.5)                                 | 0                     | 40 (4.1)     |
| A98G                   | 3 (1.5)                          | 8 (1.7)                          | 5 (1.7)                                  | 0                     | 16 (1.7)     |
| V179E                  | 3 (1.5)                          | 10 (2.2)                         | 2 (0.7)                                  | 0                     | 15 (1.5)     |
| V108I                  | 6 (2.9)                          | 5 (1.1)                          | 3 (1)                                    | 0                     | 14 (1.4)     |

<sup>1</sup> Sequences from individuals not on ART or with unknown regimens.

ART: antiretroviral therapy, NRTI: nucleoside reverse transcriptase inhibitor, NNRTI: non-nucleoside reverse transcriptase inhibitor.
